# Supplementary material for: Preferences of Pinus Sylvestris Seedling Roots for Different Phosphorus Sources under Phosphorus-Deficient Conditions
Source: Research Square preprint supplement (doi:10.21203/rs.3.rs-1204702/v1), 2022-01-19
Supplement: Supplementary file 1 [file 6174065d24d85376646eee89.xlsx]

## Sheet: Temp & RH
Preferences of Pinus sylvestris seedling roots for different phosphorus sources under phosphorus-deficient conditions
Kaiyu Lei1, 2, Hamish Creber2, Roland Bol1,3 and Saran P. Sohi2*
1 Institute for Biodiversity and Ecosystem Dynamics, University of Amsterdam, 1090GE, Amsterdam, Netherlands
2 UK Biochar Research Centre (UKBRC), School of GeoSciences, The University of Edinburgh, EH9 3FF, Edinburgh, United Kingdom
3 Agrosphere (IBG-3), Institute of Bio- and Geosciences, Forschungszentrum Jülich GmbH, 52428, Jülich, Germany
* Corresponding author
Room Temperature and Relative Humidity during 10 weekscultivation period
Date&Time	Temp/°C	RH/%
2020-12-22	17.84	65.19
2020-12-22 00:15:00	17.06	67.44
2020-12-22 00:30:00	18.47	61.24
2020-12-22 00:45:00	17.74	61.81
2020-12-22 01:00:00	17.37	65.19
2020-12-22 01:15:00	17.16	65.75
2020-12-22 01:30:00	18.26	61.24
2020-12-22 01:45:00	17.63	62.93
2020-12-22 02:00:00	17.27	65.75
2020-12-22 02:15:00	17.48	66.88
2020-12-22 02:30:00	18.16	61.24
2020-12-22 02:45:00	17.53	64.06
2020-12-22 03:00:00	17.22	66.88
2020-12-22 03:15:00	17.53	68
2020-12-22 03:30:00	18.16	61.81
2020-12-22 03:45:00	17.53	64.62
2020-12-22 04:00:00	17.16	68
2020-12-22 04:15:00	17.48	64.62
2020-12-22 04:30:00	17.84	62.93
2020-12-22 04:45:00	17.42	65.75
2020-12-22 05:00:00	17.32	68.57
2020-12-22 05:15:00	17.53	65.19
2020-12-22 05:30:00	18.63	61.24
2020-12-22 05:45:00	18.21	61.81
2020-12-22 06:00:00	19.41	60.68
2020-12-22 06:15:00	20.4	56.73
2020-12-22 06:30:00	21.55	50.53
2020-12-22 06:45:00	21.4	48.84
2020-12-22 07:00:00	21.45	48.28
2020-12-22 07:15:00	21.55	47.15
2020-12-22 07:30:00	21.61	46.59
2020-12-22 07:45:00	21.71	46.03
2020-12-22 08:00:00	21.5	46.03
2020-12-22 08:15:00	21.19	46.03
2020-12-22 08:30:00	20.98	49.41
2020-12-22 08:45:00	21.81	48.28
2020-12-22 09:00:00	21.5	47.15
2020-12-22 09:15:00	21.45	46.59
2020-12-22 09:30:00	21.5	45.46
2020-12-22 09:45:00	21.4	52.79
2020-12-22 10:00:00	20.51	60.68
2020-12-22 10:15:00	20.19	62.93
2020-12-22 10:30:00	21.45	58.99
2020-12-22 10:45:00	21.24	58.42
2020-12-22 11:00:00	21.24	57.3
2020-12-22 11:15:00	20.77	58.42
2020-12-22 11:30:00	21.29	60.12
2020-12-22 11:45:00	21.5	61.81
2020-12-22 12:00:00	21.5	60.68
2020-12-22 12:15:00	21.92	57.3
2020-12-22 12:30:00	21.5	52.79
2020-12-22 12:45:00	21.55	52.23
2020-12-22 13:00:00	21.66	49.97
2020-12-22 13:15:00	21.61	46.59
2020-12-22 13:30:00	21.5	46.03
2020-12-22 13:45:00	21.4	47.15
2020-12-22 14:00:00	21.34	47.15
2020-12-22 14:15:00	21.45	48.28
2020-12-22 14:30:00	21.34	49.41
2020-12-22 14:45:00	21.4	49.97
2020-12-22 15:00:00	21.4	52.79
2020-12-22 15:15:00	21.14	53.92
2020-12-22 15:30:00	21.45	55.61
2020-12-22 15:45:00	21.87	55.61
2020-12-22 16:00:00	21.55	52.23
2020-12-22 16:15:00	21.08	52.23
2020-12-22 16:30:00	21.14	55.04
2020-12-22 16:45:00	21.4	53.92
2020-12-22 17:00:00	21.61	55.04
2020-12-22 17:15:00	21.14	53.92
2020-12-22 17:30:00	21.71	55.61
2020-12-22 17:45:00	21.08	53.92
2020-12-22 18:00:00	21.92	53.92
2020-12-22 18:15:00	20.98	52.79
2020-12-22 18:30:00	21.71	53.35
2020-12-22 18:45:00	21.61	52.23
2020-12-22 19:00:00	21.45	51.1
2020-12-22 19:15:00	21.5	49.97
2020-12-22 19:30:00	21.45	50.53
2020-12-22 19:45:00	21.45	49.41
2020-12-22 20:00:00	21.45	49.41
2020-12-22 20:15:00	21.5	48.84
2020-12-22 20:30:00	21.4	49.41
2020-12-22 20:45:00	21.29	49.41
2020-12-22 21:00:00	21.34	48.84
2020-12-22 21:15:00	21.45	48.28
2020-12-22 21:30:00	21.45	48.84
2020-12-22 21:45:00	21.45	48.84
2020-12-22 22:00:00	21.45	48.84
2020-12-22 22:15:00	21.03	48.28
2020-12-22 22:30:00	20.04	53.35
2020-12-22 22:45:00	19.36	57.3
2020-12-22 23:00:00	18.99	59.55
2020-12-22 23:15:00	18.37	61.81
2020-12-22 23:30:00	18.21	62.93
2020-12-22 23:45:00	18.16	64.62
2020-12-23	18.16	65.19
2020-12-23 00:15:00	17.11	67.44
2020-12-23 00:30:00	18.21	62.93
2020-12-23 00:45:00	17.84	63.5
2020-12-23 01:00:00	17.48	66.31
2020-12-23 01:15:00	17.11	66.88
2020-12-23 01:30:00	18.21	61.81
2020-12-23 01:45:00	17.63	64.06
2020-12-23 02:00:00	17.22	68
2020-12-23 02:15:00	17.58	68
2020-12-23 02:30:00	17.95	63.5
2020-12-23 02:45:00	17.27	66.88
2020-12-23 03:00:00	17.53	68
2020-12-23 03:15:00	17.22	66.31
2020-12-23 03:30:00	18.16	62.37
2020-12-23 03:45:00	17.42	65.19
2020-12-23 04:00:00	17.32	67.44
2020-12-23 04:15:00	17.32	64.62
2020-12-23 04:30:00	18.05	62.37
2020-12-23 04:45:00	17.53	64.06
2020-12-23 05:00:00	17.16	67.44
2020-12-23 05:15:00	17.58	64.06
2020-12-23 05:30:00	18.63	61.24
2020-12-23 05:45:00	18.26	61.81
2020-12-23 06:00:00	19.04	62.93
2020-12-23 06:15:00	20.72	57.86
2020-12-23 06:30:00	21.5	53.35
2020-12-23 06:45:00	21.5	53.35
2020-12-23 07:00:00	21.45	52.23
2020-12-23 07:15:00	21.61	51.1
2020-12-23 07:30:00	21.61	49.97
2020-12-23 07:45:00	21.66	49.97
2020-12-23 08:00:00	21.5	49.97
2020-12-23 08:15:00	21.45	49.41
2020-12-23 08:30:00	21.5	48.84
2020-12-23 08:45:00	21.45	48.84
2020-12-23 09:00:00	21.5	48.28
2020-12-23 09:15:00	21.5	48.28
2020-12-23 09:30:00	21.5	47.72
2020-12-23 09:45:00	20.93	48.28
2020-12-23 10:00:00	21.66	53.35
2020-12-23 10:15:00	21.34	58.99
2020-12-23 10:30:00	21.5	61.24
2020-12-23 10:45:00	21.45	61.24
2020-12-23 11:00:00	21.5	61.24
2020-12-23 11:15:00	21.55	60.12
2020-12-23 11:30:00	21.4	58.42
2020-12-23 11:45:00	21.45	56.73
2020-12-23 12:00:00	21.5	56.17
2020-12-23 12:15:00	21.55	56.17
2020-12-23 12:30:00	21.66	56.17
2020-12-23 12:45:00	21.61	56.17
2020-12-23 13:00:00	21.5	54.48
2020-12-23 13:15:00	21.45	53.35
2020-12-23 13:30:00	21.4	53.35
2020-12-23 13:45:00	21.45	53.35
2020-12-23 14:00:00	21.55	53.35
2020-12-23 14:15:00	21.5	52.79
2020-12-23 14:30:00	21.5	52.23
2020-12-23 14:45:00	21.45	51.1
2020-12-23 15:00:00	21.4	51.66
2020-12-23 15:15:00	21.45	52.23
2020-12-23 15:30:00	21.5	52.23
2020-12-23 15:45:00	21.71	48.84
2020-12-23 16:00:00	21.4	47.15
2020-12-23 16:15:00	21.45	47.15
2020-12-23 16:30:00	21.45	47.15
2020-12-23 16:45:00	21.5	46.59
2020-12-23 17:00:00	21.45	46.59
2020-12-23 17:15:00	21.45	46.03
2020-12-23 17:30:00	21.5	46.03
2020-12-23 17:45:00	21.45	46.03
2020-12-23 18:00:00	21.45	45.46
2020-12-23 18:15:00	21.29	44.34
2020-12-23 18:30:00	21.4	44.9
2020-12-23 18:45:00	21.71	42.08
2020-12-23 19:00:00	21.45	43.21
2020-12-23 19:15:00	21.45	43.21
2020-12-23 19:30:00	21.5	42.08
2020-12-23 19:45:00	21.5	41.52
2020-12-23 20:00:00	21.45	40.95
2020-12-23 20:15:00	21.19	40.39
2020-12-23 20:30:00	20.93	43.21
2020-12-23 20:45:00	21.87	42.65
2020-12-23 21:00:00	21.5	41.52
2020-12-23 21:15:00	21.45	40.39
2020-12-23 21:30:00	21.45	40.95
2020-12-23 21:45:00	21.5	40.39
2020-12-23 22:00:00	21.5	40.39
2020-12-23 22:15:00	20.61	41.52
2020-12-23 22:30:00	19.67	46.03
2020-12-23 22:45:00	19.15	51.1
2020-12-23 23:00:00	19.52	52.23
2020-12-23 23:15:00	18.37	54.48
2020-12-23 23:30:00	18.1	56.73
2020-12-23 23:45:00	17.79	59.55
2020-12-24	17.48	61.24
2020-12-24 00:15:00	17.06	62.93
2020-12-24 00:30:00	18.21	58.42
2020-12-24 00:45:00	17.48	60.12
2020-12-24 01:00:00	17.22	63.5
2020-12-24 01:15:00	17.37	60.12
2020-12-24 01:30:00	18.05	57.3
2020-12-24 01:45:00	17.42	58.42
2020-12-24 02:00:00	17.37	61.24
2020-12-24 02:15:00	17.32	58.42
2020-12-24 02:30:00	18	57.3
2020-12-24 02:45:00	17.53	56.17
2020-12-24 03:00:00	17.22	60.68
2020-12-24 03:15:00	17.42	57.3
2020-12-24 03:30:00	17.9	56.73
2020-12-24 03:45:00	17.48	56.73
2020-12-24 04:00:00	17.37	60.12
2020-12-24 04:15:00	17.32	57.86
2020-12-24 04:30:00	18	56.17
2020-12-24 04:45:00	17.22	57.3
2020-12-24 05:00:00	17.69	58.99
2020-12-24 05:15:00	17.37	56.73
2020-12-24 05:30:00	18.57	55.04
2020-12-24 05:45:00	18.21	54.48
2020-12-24 06:00:00	19.04	56.73
2020-12-24 06:15:00	20.77	51.66
2020-12-24 06:30:00	21.66	45.46
2020-12-24 06:45:00	21.24	43.77
2020-12-24 07:00:00	21.5	43.77
2020-12-24 07:15:00	21.5	42.65
2020-12-24 07:30:00	21.5	42.65
2020-12-24 07:45:00	21.45	42.08
2020-12-24 08:00:00	21.61	41.52
2020-12-24 08:15:00	21.71	41.52
2020-12-24 08:30:00	21.45	40.95
2020-12-24 08:45:00	21.45	40.39
2020-12-24 09:00:00	21.45	39.26
2020-12-24 09:15:00	21.29	39.26
2020-12-24 09:30:00	20.56	42.65
2020-12-24 09:45:00	21.19	49.97
2020-12-24 10:00:00	20.35	64.62
2020-12-24 10:15:00	20.35	70.26
2020-12-24 10:30:00	20.87	72.51
2020-12-24 10:45:00	21.34	74.77
2020-12-24 11:00:00	21.45	75.33
2020-12-24 11:15:00	21.14	73.08
2020-12-24 11:30:00	21.29	71.39
2020-12-24 11:45:00	21.4	71.95
2020-12-24 12:00:00	21.45	71.95
2020-12-24 12:15:00	21.55	69.7
2020-12-24 12:30:00	21.45	65.75
2020-12-24 12:45:00	21.61	61.81
2020-12-24 13:00:00	21.71	58.42
2020-12-24 13:15:00	21.5	56.73
2020-12-24 13:30:00	21.4	55.04
2020-12-24 13:45:00	21.24	54.48
2020-12-24 14:00:00	22.13	50.53
2020-12-24 14:15:00	21.45	42.65
2020-12-24 14:30:00	21.4	42.65
2020-12-24 14:45:00	21.24	42.08
2020-12-24 15:00:00	21.19	43.77
2020-12-24 15:15:00	21.34	47.15
2020-12-24 15:30:00	21.5	50.53
2020-12-24 15:45:00	21.45	51.1
2020-12-24 16:00:00	21.87	51.66
2020-12-24 16:15:00	20.87	49.97
2020-12-24 16:30:00	21.66	51.1
2020-12-24 16:45:00	20.87	50.53
2020-12-24 17:00:00	21.81	50.53
2020-12-24 17:15:00	20.93	49.97
2020-12-24 17:30:00	21.87	49.41
2020-12-24 17:45:00	20.87	48.84
2020-12-24 18:00:00	21.66	48.28
2020-12-24 18:15:00	20.67	49.41
2020-12-24 18:30:00	21.76	49.97
2020-12-24 18:45:00	21.03	49.41
2020-12-24 19:00:00	21.76	47.72
2020-12-24 19:15:00	20.87	48.28
2020-12-24 19:30:00	21.76	47.72
2020-12-24 19:45:00	21.19	47.72
2020-12-24 20:00:00	21.55	46.03
2020-12-24 20:15:00	20.93	47.15
2020-12-24 20:30:00	21.76	48.28
2020-12-24 20:45:00	21.66	44.9
2020-12-24 21:00:00	21.5	42.65
2020-12-24 21:15:00	21.5	40.95
2020-12-24 21:30:00	21.45	40.95
2020-12-24 21:45:00	21.34	40.95
2020-12-24 22:00:00	21.4	40.95
2020-12-24 22:15:00	20.72	40.95
2020-12-24 22:30:00	19.83	45.46
2020-12-24 22:45:00	19.15	50.53
2020-12-24 23:00:00	18.84	55.04
2020-12-24 23:15:00	18.42	55.61
2020-12-24 23:30:00	18.05	56.73
2020-12-24 23:45:00	17.84	59.55
2020-12-25	17.58	61.81
2020-12-25 00:15:00	17.11	62.93
2020-12-25 00:30:00	18.21	57.86
2020-12-25 00:45:00	17.42	60.12
2020-12-25 01:00:00	17.27	63.5
2020-12-25 01:15:00	17.37	60.12
2020-12-25 01:30:00	18.05	56.73
2020-12-25 01:45:00	17.32	58.42
2020-12-25 02:00:00	17.58	61.24
2020-12-25 02:15:00	17.27	57.86
2020-12-25 02:30:00	18	56.73
2020-12-25 02:45:00	17.42	56.17
2020-12-25 03:00:00	17.32	60.12
2020-12-25 03:15:00	17.37	56.73
2020-12-25 03:30:00	18	55.61
2020-12-25 03:45:00	17.42	55.04
2020-12-25 04:00:00	17.37	58.42
2020-12-25 04:15:00	17.27	56.73
2020-12-25 04:30:00	18.05	54.48
2020-12-25 04:45:00	17.16	56.73
2020-12-25 05:00:00	17.74	58.42
2020-12-25 05:15:00	17.32	55.61
2020-12-25 05:30:00	18.57	53.35
2020-12-25 05:45:00	18.1	54.48
2020-12-25 06:00:00	19.36	53.35
2020-12-25 06:15:00	20.51	52.79
2020-12-25 06:30:00	21.34	47.72
2020-12-25 06:45:00	21.5	48.28
2020-12-25 07:00:00	21.45	48.28
2020-12-25 07:15:00	21.5	47.15
2020-12-25 07:30:00	21.5	46.03
2020-12-25 07:45:00	21.45	45.46
2020-12-25 08:00:00	21.45	44.34
2020-12-25 08:15:00	21.5	43.77
2020-12-25 08:30:00	21.5	42.65
2020-12-25 08:45:00	21.61	41.52
2020-12-25 09:00:00	21.66	41.52
2020-12-25 09:15:00	21.24	41.52
2020-12-25 09:30:00	21.08	44.34
2020-12-25 09:45:00	21.08	53.35
2020-12-25 10:00:00	21.08	65.19
2020-12-25 10:15:00	21.19	69.13
2020-12-25 10:30:00	21.5	69.13
2020-12-25 10:45:00	21.5	67.44
2020-12-25 11:00:00	21.5	65.75
2020-12-25 11:15:00	21.55	64.06
2020-12-25 11:30:00	21.5	61.81
2020-12-25 11:45:00	21.34	60.68
2020-12-25 12:00:00	21.5	61.24
2020-12-25 12:15:00	21.55	60.12
2020-12-25 12:30:00	21.97	56.73
2020-12-25 12:45:00	21.19	57.3
2020-12-25 13:00:00	21.5	58.42
2020-12-25 13:15:00	21.55	58.42
2020-12-25 13:30:00	21.61	55.04
2020-12-25 13:45:00	21.34	55.61
2020-12-25 14:00:00	21.5	56.17
2020-12-25 14:15:00	21.4	56.73
2020-12-25 14:30:00	21.29	57.3
2020-12-25 14:45:00	21.29	55.04
2020-12-25 15:00:00	21.45	56.17
2020-12-25 15:15:00	21.45	57.3
2020-12-25 15:30:00	21.5	55.61
2020-12-25 15:45:00	21.92	56.17
2020-12-25 16:00:00	21.45	55.61
2020-12-25 16:15:00	21.5	52.79
2020-12-25 16:30:00	21.5	52.23
2020-12-25 16:45:00	21.45	52.79
2020-12-25 17:00:00	21.19	52.79
2020-12-25 17:15:00	21.08	50.53
2020-12-25 17:30:00	21.45	52.79
2020-12-25 17:45:00	21.76	53.35
2020-12-25 18:00:00	21.4	52.23
2020-12-25 18:15:00	21.08	49.97
2020-12-25 18:30:00	21.34	51.66
2020-12-25 18:45:00	21.19	49.97
2020-12-25 19:00:00	21.66	51.66
2020-12-25 19:15:00	21.71	51.66
2020-12-25 19:30:00	21.45	52.23
2020-12-25 19:45:00	21.45	51.1
2020-12-25 20:00:00	21.29	51.1
2020-12-25 20:15:00	21.34	51.1
2020-12-25 20:30:00	21.5	51.66
2020-12-25 20:45:00	21.55	51.66
2020-12-25 21:00:00	21.66	51.66
2020-12-25 21:15:00	21.66	51.1
2020-12-25 21:30:00	21.4	50.53
2020-12-25 21:45:00	21.34	52.79
2020-12-25 22:00:00	21.4	52.23
2020-12-25 22:15:00	20.87	52.23
2020-12-25 22:30:00	20.4	55.61
2020-12-25 22:45:00	19.88	60.68
2020-12-25 23:00:00	19.57	65.19
2020-12-25 23:15:00	18.84	68.57
2020-12-25 23:30:00	18.1	69.7
2020-12-25 23:45:00	18.37	70.82
2020-12-26	18.42	73.64
2020-12-26 00:15:00	17.42	78.15
2020-12-26 00:30:00	17.53	80.4
2020-12-26 00:45:00	17.63	82.66
2020-12-26 01:00:00	17.42	84.35
2020-12-26 01:15:00	17.06	83.22
2020-12-26 01:30:00	18.21	76.46
2020-12-26 01:45:00	18	77.59
2020-12-26 02:00:00	17.63	80.4
2020-12-26 02:15:00	17.06	79.84
2020-12-26 02:30:00	18.1	74.2
2020-12-26 02:45:00	17.79	74.77
2020-12-26 03:00:00	17.48	78.71
2020-12-26 03:15:00	17.11	79.28
2020-12-26 03:30:00	18.21	71.39
2020-12-26 03:45:00	17.69	73.08
2020-12-26 04:00:00	17.42	76.46
2020-12-26 04:15:00	17.16	77.59
2020-12-26 04:30:00	18.26	70.26
2020-12-26 04:45:00	17.69	73.64
2020-12-26 05:00:00	17.37	77.59
2020-12-26 05:15:00	17.37	78.15
2020-12-26 05:30:00	18.78	69.7
2020-12-26 05:45:00	18.16	72.51
2020-12-26 06:00:00	19.25	71.39
2020-12-26 06:15:00	20.56	63.5
2020-12-26 06:30:00	21.55	56.73
2020-12-26 06:45:00	21.34	55.04
2020-12-26 07:00:00	21.45	55.04
2020-12-26 07:15:00	21.55	53.92
2020-12-26 07:30:00	21.45	53.35
2020-12-26 07:45:00	21.55	52.79
2020-12-26 08:00:00	21.76	51.66
2020-12-26 08:15:00	21.24	51.66
2020-12-26 08:30:00	21.08	53.92
2020-12-26 08:45:00	21.76	53.35
2020-12-26 09:00:00	21.24	52.23
2020-12-26 09:15:00	21.4	50.53
2020-12-26 09:30:00	21.45	50.53
2020-12-26 09:45:00	21.45	53.35
2020-12-26 10:00:00	21.03	63.5
2020-12-26 10:15:00	20.4	69.13
2020-12-26 10:30:00	21.14	66.88
2020-12-26 10:45:00	21.45	66.88
2020-12-26 11:00:00	21.4	66.31
2020-12-26 11:15:00	21.29	66.31
2020-12-26 11:30:00	21.45	66.31
2020-12-26 11:45:00	21.4	64.06
2020-12-26 12:00:00	21.4	61.81
2020-12-26 12:15:00	21.45	60.12
2020-12-26 12:30:00	21.4	59.55
2020-12-26 12:45:00	21.34	58.42
2020-12-26 13:00:00	21.34	57.3
2020-12-26 13:15:00	21.14	59.55
2020-12-26 13:30:00	21.4	61.81
2020-12-26 13:45:00	21.5	61.24
2020-12-26 14:00:00	21.45	57.86
2020-12-26 14:15:00	21.5	57.86
2020-12-26 14:30:00	21.45	57.3
2020-12-26 14:45:00	21.4	57.86
2020-12-26 15:00:00	21.45	56.73
2020-12-26 15:15:00	21.45	56.73
2020-12-26 15:30:00	21.5	56.73
2020-12-26 15:45:00	21.45	55.61
2020-12-26 16:00:00	21.45	56.17
2020-12-26 16:15:00	21.19	55.04
2020-12-26 16:30:00	21.03	60.12
2020-12-26 16:45:00	21.45	59.55
2020-12-26 17:00:00	21.5	59.55
2020-12-26 17:15:00	21.14	59.55
2020-12-26 17:30:00	20.98	61.81
2020-12-26 17:45:00	21.19	59.55
2020-12-26 18:00:00	21.14	61.24
2020-12-26 18:15:00	21.5	58.42
2020-12-26 18:30:00	21.5	60.12
2020-12-26 18:45:00	21.45	58.99
2020-12-26 19:00:00	21.45	58.99
2020-12-26 19:15:00	21.5	59.55
2020-12-26 19:30:00	21.5	59.55
2020-12-26 19:45:00	21.45	58.99
2020-12-26 20:00:00	21.45	58.99
2020-12-26 20:15:00	21.5	58.99
2020-12-26 20:30:00	21.45	59.55
2020-12-26 20:45:00	21.45	59.55
2020-12-26 21:00:00	21.5	58.99
2020-12-26 21:15:00	21.5	59.55
2020-12-26 21:30:00	21.5	59.55
2020-12-26 21:45:00	21.45	60.68
2020-12-26 22:00:00	21.5	60.68
2020-12-26 22:15:00	21.03	61.81
2020-12-26 22:30:00	19.99	69.13
2020-12-26 22:45:00	19.41	77.02
2020-12-26 23:00:00	18.94	83.22
2020-12-26 23:15:00	18.24	84.91
2020-12-26 23:30:00	18.03	87.17
2020-12-26 23:45:00	17.82	90.55
2020-12-27	17.62	93.36
2020-12-27 00:15:00	17.09	89.98
2020-12-27 00:30:00	18.29	80.97
2020-12-27 00:45:00	17.77	86.04
2020-12-27 01:00:00	17.41	91.11
2020-12-27 01:15:00	17.25	92.24
2020-12-27 01:30:00	18.14	84.91
2020-12-27 01:45:00	17.46	89.98
2020-12-27 02:00:00	17.15	95.06
2020-12-27 02:15:00	17.41	88.29
2020-12-27 02:30:00	18.14	80.97
2020-12-27 02:45:00	17.46	84.35
2020-12-27 03:00:00	17.25	89.98
2020-12-27 03:15:00	17.35	84.35
2020-12-27 03:30:00	18.09	78.15
2020-12-27 03:45:00	17.41	82.09
2020-12-27 04:00:00	17.41	87.17
2020-12-27 04:15:00	17.3	80.97
2020-12-27 04:30:00	17.93	78.71
2020-12-27 04:45:00	17.51	77.02
2020-12-27 05:00:00	17.25	83.22
2020-12-27 05:15:00	17.51	77.59
2020-12-27 05:30:00	18.5	73.08
2020-12-27 05:45:00	18.14	78.71
2020-12-27 06:00:00	19.5	72.51
2020-12-27 06:15:00	20.44	68.57
2020-12-27 06:30:00	21.38	62.37
2020-12-27 06:45:00	21.48	62.93
2020-12-27 07:00:00	21.38	62.93
2020-12-27 07:15:00	21.53	62.37
2020-12-27 07:30:00	21.43	61.81
2020-12-27 07:45:00	21.48	60.68
2020-12-27 08:00:00	21.48	60.12
2020-12-27 08:15:00	21.48	59.55
2020-12-27 08:30:00	21.48	58.42
2020-12-27 08:45:00	21.48	58.42
2020-12-27 09:00:00	21.48	57.86
2020-12-27 09:15:00	21.43	57.86
2020-12-27 09:30:00	21.43	57.3
2020-12-27 09:45:00	21.43	62.93
2020-12-27 10:00:00	20.65	68.57
2020-12-27 10:15:00	20.23	73.64
2020-12-27 10:30:00	21.32	71.95
2020-12-27 10:45:00	21.32	73.08
2020-12-27 11:00:00	21.32	73.64
2020-12-27 11:15:00	20.49	70.82
2020-12-27 11:30:00	20.54	71.95
2020-12-27 11:45:00	20.91	73.64
2020-12-27 12:00:00	21.27	72.51
2020-12-27 12:15:00	20.85	70.82
2020-12-27 12:30:00	21.48	65.75
2020-12-27 12:45:00	21.69	61.24
2020-12-27 13:00:00	21.69	56.73
2020-12-27 13:15:00	21.43	51.66
2020-12-27 13:30:00	21.22	53.92
2020-12-27 13:45:00	21.38	53.35
2020-12-27 14:00:00	21.43	53.92
2020-12-27 14:15:00	21.48	55.61
2020-12-27 14:30:00	21.38	55.61
2020-12-27 14:45:00	21.48	57.3
2020-12-27 15:00:00	21.48	59.55
2020-12-27 15:15:00	21.38	60.68
2020-12-27 15:30:00	21.32	64.06
2020-12-27 15:45:00	21.17	62.37
2020-12-27 16:00:00	21.27	62.93
2020-12-27 16:15:00	21.43	56.73
2020-12-27 16:30:00	21.48	55.04
2020-12-27 16:45:00	21.48	54.48
2020-12-27 17:00:00	21.48	53.92
2020-12-27 17:15:00	21.48	53.35
2020-12-27 17:30:00	21.48	53.35
2020-12-27 17:45:00	21.43	52.79
2020-12-27 18:00:00	21.48	54.48
2020-12-27 18:15:00	21.48	53.92
2020-12-27 18:30:00	21.48	54.48
2020-12-27 18:45:00	21.48	54.48
2020-12-27 19:00:00	21.53	53.92
2020-12-27 19:15:00	21.43	55.04
2020-12-27 19:30:00	21.43	54.48
2020-12-27 19:45:00	21.48	53.92
2020-12-27 20:00:00	21.48	53.92
2020-12-27 20:15:00	21.48	53.92
2020-12-27 20:30:00	21.48	54.48
2020-12-27 20:45:00	21.48	55.04
2020-12-27 21:00:00	21.43	55.04
2020-12-27 21:15:00	21.48	55.04
2020-12-27 21:30:00	21.48	55.04
2020-12-27 21:45:00	21.43	55.04
2020-12-27 22:00:00	21.48	54.48
2020-12-27 22:15:00	20.18	56.17
2020-12-27 22:30:00	20.02	58.99
2020-12-27 22:45:00	19.5	61.81
2020-12-27 23:00:00	18.61	68.57
2020-12-27 23:15:00	18.35	66.88
2020-12-27 23:30:00	17.82	68.57
2020-12-27 23:45:00	17.41	71.95
2020-12-28	17.2	74.77
2020-12-28 00:15:00	17.46	71.95
2020-12-28 00:30:00	17.98	68.57
2020-12-28 00:45:00	17.15	73.08
2020-12-28 01:00:00	17.77	71.39
2020-12-28 01:15:00	17.09	70.82
2020-12-28 01:30:00	17.98	65.19
2020-12-28 01:45:00	17.09	69.13
2020-12-28 02:00:00	17.82	70.26
2020-12-28 02:15:00	17.09	65.75
2020-12-28 02:30:00	17.98	63.5
2020-12-28 02:45:00	17.09	66.88
2020-12-28 03:00:00	17.72	69.13
2020-12-28 03:15:00	17.2	63.5
2020-12-28 03:30:00	17.98	62.37
2020-12-28 03:45:00	17.15	65.19
2020-12-28 04:00:00	17.46	69.13
2020-12-28 04:15:00	17.41	62.37
2020-12-28 04:30:00	17.88	61.24
2020-12-28 04:45:00	17.09	64.06
2020-12-28 05:00:00	17.51	68.57
2020-12-28 05:15:00	17.56	61.81
2020-12-28 05:30:00	18.09	63.5
2020-12-28 05:45:00	18.77	59.55
2020-12-28 06:00:00	18.82	62.37
2020-12-28 06:15:00	20.8	57.86
2020-12-28 06:30:00	21.22	55.04
2020-12-28 06:45:00	21.43	56.17
2020-12-28 07:00:00	21.38	56.73
2020-12-28 07:15:00	20.8	57.86
2020-12-28 07:30:00	21.38	55.61
2020-12-28 07:45:00	21.48	56.73
2020-12-28 08:00:00	21.43	56.73
2020-12-28 08:15:00	20.85	56.73
2020-12-28 08:30:00	21.32	55.04
2020-12-28 08:45:00	21.43	55.61
2020-12-28 09:00:00	21.48	55.61
2020-12-28 09:15:00	21.48	55.04
2020-12-28 09:30:00	21.48	55.04
2020-12-28 09:45:00	20.54	58.99
2020-12-28 10:00:00	20.49	68.57
2020-12-28 10:15:00	20.38	69.7
2020-12-28 10:30:00	20.8	70.82
2020-12-28 10:45:00	21.27	71.95
2020-12-28 11:00:00	21.43	71.95
2020-12-28 11:15:00	21.17	69.7
2020-12-28 11:30:00	21.48	69.13
2020-12-28 11:45:00	21.48	68
2020-12-28 12:00:00	21.48	66.88
2020-12-28 12:15:00	21.59	65.19
2020-12-28 12:30:00	21.48	62.93
2020-12-28 12:45:00	21.43	61.81
2020-12-28 13:00:00	21.43	61.24
2020-12-28 13:15:00	21.43	60.68
2020-12-28 13:30:00	21.48	61.24
2020-12-28 13:45:00	21.48	60.68
2020-12-28 14:00:00	21.43	58.99
2020-12-28 14:15:00	21.53	60.12
2020-12-28 14:30:00	21.48	60.12
2020-12-28 14:45:00	21.48	60.12
2020-12-28 15:00:00	21.43	59.55
2020-12-28 15:15:00	21.43	60.12
2020-12-28 15:30:00	21.43	60.68
2020-12-28 15:45:00	21.59	60.12
2020-12-28 16:00:00	21.43	58.42
2020-12-28 16:15:00	21.27	55.61
2020-12-28 16:30:00	21.32	56.17
2020-12-28 16:45:00	21.12	53.92
2020-12-28 17:00:00	21.59	55.04
2020-12-28 17:15:00	20.91	53.35
2020-12-28 17:30:00	21.69	53.92
2020-12-28 17:45:00	20.96	53.35
2020-12-28 18:00:00	21.9	52.23
2020-12-28 18:15:00	20.85	52.23
2020-12-28 18:30:00	21.85	52.23
2020-12-28 18:45:00	20.91	50.53
2020-12-28 19:00:00	21.9	50.53
2020-12-28 19:15:00	21.53	47.15
2020-12-28 19:30:00	21.48	45.46
2020-12-28 19:45:00	21.48	43.77
2020-12-28 20:00:00	21.48	43.21
2020-12-28 20:15:00	21.27	43.21
2020-12-28 20:30:00	20.96	46.03
2020-12-28 20:45:00	21.85	45.46
2020-12-28 21:00:00	21.48	44.34
2020-12-28 21:15:00	21.48	43.77
2020-12-28 21:30:00	21.48	43.21
2020-12-28 21:45:00	21.48	43.21
2020-12-28 22:00:00	21.48	43.21
2020-12-28 22:15:00	20.8	44.34
2020-12-28 22:30:00	19.76	48.28
2020-12-28 22:45:00	19.29	53.35
2020-12-28 23:00:00	18.82	58.42
2020-12-28 23:15:00	18.03	60.68
2020-12-28 23:30:00	17.82	61.24
2020-12-28 23:45:00	17.98	62.93
2020-12-29	17.77	65.75
2020-12-29 00:15:00	17.04	67.44
2020-12-29 00:30:00	18.29	61.81
2020-12-29 00:45:00	17.62	64.06
2020-12-29 01:00:00	17.15	67.44
2020-12-29 01:15:00	17.46	65.19
2020-12-29 01:30:00	18.09	60.68
2020-12-29 01:45:00	17.25	64.62
2020-12-29 02:00:00	17.62	66.31
2020-12-29 02:15:00	17.15	65.19
2020-12-29 02:30:00	18.14	62.37
2020-12-29 02:45:00	17.62	61.24
2020-12-29 03:00:00	17.09	65.75
2020-12-29 03:15:00	17.41	64.62
2020-12-29 03:30:00	18.14	61.24
2020-12-29 03:45:00	17.35	63.5
2020-12-29 04:00:00	17.35	66.31
2020-12-29 04:15:00	17.3	65.19
2020-12-29 04:30:00	18.09	61.81
2020-12-29 04:45:00	17.3	64.62
2020-12-29 05:00:00	17.56	66.88
2020-12-29 05:15:00	17.35	65.19
2020-12-29 05:30:00	18.61	62.37
2020-12-29 05:45:00	18.19	62.37
2020-12-29 06:00:00	19.34	61.24
2020-12-29 06:15:00	20.54	58.42
2020-12-29 06:30:00	21.32	52.79
2020-12-29 06:45:00	21.48	52.23
2020-12-29 07:00:00	21.48	52.23
2020-12-29 07:15:00	21.48	50.53
2020-12-29 07:30:00	21.48	49.41
2020-12-29 07:45:00	21.48	48.28
2020-12-29 08:00:00	21.48	47.15
2020-12-29 08:15:00	21.53	46.59
2020-12-29 08:30:00	21.38	45.46
2020-12-29 08:45:00	21.59	44.9
2020-12-29 09:00:00	21.48	44.9
2020-12-29 09:15:00	21.43	45.46
2020-12-29 09:30:00	21.32	46.59
2020-12-29 09:45:00	20.38	51.66
2020-12-29 10:00:00	20.49	56.73
2020-12-29 10:15:00	20.38	57.86
2020-12-29 10:30:00	20.85	57.86
2020-12-29 10:45:00	21.38	58.99
2020-12-29 11:00:00	21.43	59.55
2020-12-29 11:15:00	21.12	57.86
2020-12-29 11:30:00	21.48	57.3
2020-12-29 11:45:00	21.48	61.81
2020-12-29 12:00:00	21.43	67.09
2020-12-29 12:15:00	21.85	69.52
2020-12-29 12:30:00	21.38	62.83
2020-12-29 12:45:00	21.22	65.26
2020-12-29 13:00:00	21.95	68.91
2020-12-29 13:15:00	21.48	69.52
2020-12-29 13:30:00	21.32	63.44
2020-12-29 13:45:00	22.11	66.48
2020-12-29 14:00:00	21.59	69.52
2020-12-29 14:15:00	20.91	65.87
2020-12-29 14:30:00	21.27	62.83
2020-12-29 14:45:00	22.11	64.65
2020-12-29 15:00:00	21.12	67.69
2020-12-29 15:15:00	21.01	64.65
2020-12-29 15:30:00	21.43	61
2020-12-29 15:45:00	21.8	63.44
2020-12-29 16:00:00	21.17	65.26
2020-12-29 16:15:00	21.74	64.04
2020-12-29 16:30:00	21.59	61
2020-12-29 16:45:00	21.48	61.61
2020-12-29 17:00:00	21.48	65.87
2020-12-29 17:15:00	21.22	63.44
2020-12-29 17:30:00	21.06	61
2020-12-29 17:45:00	21.48	61.61
2020-12-29 18:00:00	21.59	61
2020-12-29 18:15:00	21.17	58.57
2020-12-29 18:30:00	21.32	52.49
2020-12-29 18:45:00	21.43	51.88
2020-12-29 19:00:00	21.32	50.67
2020-12-29 19:15:00	21.38	49.45
2020-12-29 19:30:00	21.38	48.24
2020-12-29 19:45:00	21.27	47.02
2020-12-29 20:00:00	21.59	46.41
2020-12-29 20:15:00	21.32	45.2
2020-12-29 20:30:00	21.06	45.8
2020-12-29 20:45:00	21.85	45.8
2020-12-29 21:00:00	21.48	45.2
2020-12-29 21:15:00	21.48	45.8
2020-12-29 21:30:00	21.48	50.67
2020-12-29 21:45:00	21.48	50.67
2020-12-29 22:00:00	21.48	53.71
2020-12-29 22:15:00	20.75	53.71
2020-12-29 22:30:00	19.76	55.53
2020-12-29 22:45:00	19.18	57.36
2020-12-29 23:00:00	18.82	61
2020-12-29 23:15:00	18.4	65.26
2020-12-29 23:30:00	18.19	65.87
2020-12-29 23:45:00	17.98	65.26
2020-12-30	17.67	63.44
2020-12-30 00:15:00	17.04	59.18
2020-12-30 00:30:00	18.35	53.1
2020-12-30 00:45:00	17.67	47.63
2020-12-30 01:00:00	17.25	43.37
2020-12-30 01:15:00	17.46	40.94
2020-12-30 01:30:00	18.14	39.72
2020-12-30 01:45:00	17.41	39.12
2020-12-30 02:00:00	17.25	39.12
2020-12-30 02:15:00	17.35	38.51
2020-12-30 02:30:00	18.09	39.12
2020-12-30 02:45:00	17.46	39.72
2020-12-30 03:00:00	17.3	39.72
2020-12-30 03:15:00	17.3	42.16
2020-12-30 03:30:00	18.03	45.2
2020-12-30 03:45:00	17.15	44.59
2020-12-30 04:00:00	17.82	45.8
2020-12-30 04:15:00	17.09	42.76
2020-12-30 04:30:00	17.98	45.8
2020-12-30 04:45:00	17.09	45.2
2020-12-30 05:00:00	18.03	47.02
2020-12-30 05:15:00	17.25	46.41
2020-12-30 05:30:00	18.5	48.84
2020-12-30 05:45:00	18.24	47.63
2020-12-30 06:00:00	19.18	48.84
2020-12-30 06:15:00	20.54	47.02
2020-12-30 06:30:00	21.27	48.84
2020-12-30 06:45:00	21.43	47.63
2020-12-30 07:00:00	21.48	48.24
2020-12-30 07:15:00	21.06	47.63
2020-12-30 07:30:00	21.48	50.06
2020-12-30 07:45:00	21.48	47.63
2020-12-30 08:00:00	21.48	48.84
2020-12-30 08:15:00	21.43	47.02
2020-12-30 08:30:00	21.53	48.24
2020-12-30 08:45:00	21.48	43.98
2020-12-30 09:00:00	21.43	41.55
2020-12-30 09:15:00	21.06	40.33
2020-12-30 09:30:00	20.07	39.72
2020-12-30 09:45:00	21.06	39.12
2020-12-30 10:00:00	21.48	38.51
2020-12-30 10:15:00	21.01	39.12
2020-12-30 10:30:00	20.85	43.98
2020-12-30 10:45:00	21.12	48.24
2020-12-30 11:00:00	21.27	49.45
2020-12-30 11:15:00	20.91	51.88
2020-12-30 11:30:00	21.17	54.32
2020-12-30 11:45:00	21.48	57.36
2020-12-30 12:00:00	21.48	59.18
2020-12-30 12:15:00	21.69	59.79
2020-12-30 12:30:00	21.8	56.14
2020-12-30 12:45:00	21.64	58.57
2020-12-30 13:00:00	21.01	61
2020-12-30 13:15:00	21.69	57.96
2020-12-30 13:30:00	21.95	54.32
2020-12-30 13:45:00	21.32	57.36
2020-12-30 14:00:00	21.43	57.36
2020-12-30 14:15:00	21.48	57.36
2020-12-30 14:30:00	21.17	53.71
2020-12-30 14:45:00	21.48	56.75
2020-12-30 15:00:00	21.06	56.14
2020-12-30 15:15:00	21.43	56.75
2020-12-30 15:30:00	21.48	52.49
2020-12-30 15:45:00	21.64	55.53
2020-12-30 16:00:00	21.06	55.53
2020-12-30 16:15:00	21.53	55.53
2020-12-30 16:30:00	21.01	52.49
2020-12-30 16:45:00	21.59	55.53
2020-12-30 17:00:00	21.22	56.14
2020-12-30 17:15:00	21.32	56.14
2020-12-30 17:30:00	21.32	53.1
2020-12-30 17:45:00	21.22	54.32
2020-12-30 18:00:00	21.48	53.1
2020-12-30 18:15:00	21.12	51.88
2020-12-30 18:30:00	21.59	46.41
2020-12-30 18:45:00	21.01	47.02
2020-12-30 19:00:00	21.59	46.41
2020-12-30 19:15:00	21.12	45.2
2020-12-30 19:30:00	21.38	43.98
2020-12-30 19:45:00	21.22	42.76
2020-12-30 20:00:00	21.43	42.16
2020-12-30 20:15:00	21.17	42.16
2020-12-30 20:30:00	21.38	42.16
2020-12-30 20:45:00	21.74	42.16
2020-12-30 21:00:00	21.48	42.16
2020-12-30 21:15:00	21.48	42.76
2020-12-30 21:30:00	21.48	46.41
2020-12-30 21:45:00	21.48	46.41
2020-12-30 22:00:00	21.48	49.45
2020-12-30 22:15:00	20.7	48.84
2020-12-30 22:30:00	19.76	50.06
2020-12-30 22:45:00	19.24	50.06
2020-12-30 23:00:00	18.77	52.49
2020-12-30 23:15:00	18.03	53.1
2020-12-30 23:30:00	17.88	55.53
2020-12-30 23:45:00	17.93	70.73
2020-12-31	17.72	76.21
2020-12-31 00:15:00	17.04	74.38
2020-12-31 00:30:00	18.35	70.13
2020-12-31 00:45:00	17.67	62.83
2020-12-31 01:00:00	17.2	57.36
2020-12-31 01:15:00	17.67	52.49
2020-12-31 01:30:00	17.93	48.84
2020-12-31 01:45:00	17.25	49.45
2020-12-31 02:00:00	17.56	53.71
2020-12-31 02:15:00	17.2	57.36
2020-12-31 02:30:00	17.98	54.32
2020-12-31 02:45:00	17.67	54.92
2020-12-31 03:00:00	17.2	51.88
2020-12-31 03:15:00	17.51	54.32
2020-12-31 03:30:00	18.09	58.57
2020-12-31 03:45:00	17.41	60.4
2020-12-31 04:00:00	17.35	62.22
2020-12-31 04:15:00	17.3	61
2020-12-31 04:30:00	18.09	62.83
2020-12-31 04:45:00	17.56	59.18
2020-12-31 05:00:00	17.15	59.79
2020-12-31 05:15:00	17.56	57.36
2020-12-31 05:30:00	18.61	57.96
2020-12-31 05:45:00	18.14	57.96
2020-12-31 06:00:00	19.34	59.18
2020-12-31 06:15:00	20.54	57.96
2020-12-31 06:30:00	21.27	60.4
2020-12-31 06:45:00	21.48	59.18
2020-12-31 07:00:00	21.48	61
2020-12-31 07:15:00	21.53	57.96
2020-12-31 07:30:00	21.48	59.79
2020-12-31 07:45:00	21.53	59.18
2020-12-31 08:00:00	21.48	61.61
2020-12-31 08:15:00	21.48	59.79
2020-12-31 08:30:00	21.48	55.53
2020-12-31 08:45:00	21.43	54.32
2020-12-31 09:00:00	21.48	52.49
2020-12-31 09:15:00	21.22	52.49
2020-12-31 09:30:00	21.12	51.28
2020-12-31 09:45:00	21.06	51.28
2020-12-31 10:00:00	20.7	50.67
2020-12-31 10:15:00	20.38	51.88
2020-12-31 10:30:00	20.65	59.79
2020-12-31 10:45:00	21.01	65.87
2020-12-31 11:00:00	21.06	65.87
2020-12-31 11:15:00	20.54	69.52
2020-12-31 11:30:00	20.7	73.17
2020-12-31 11:45:00	21.12	76.21
2020-12-31 12:00:00	21.27	78.64
2020-12-31 12:15:00	20.91	76.81
2020-12-31 12:30:00	21.17	71.95
2020-12-31 12:45:00	21.43	76.81
2020-12-31 13:00:00	21.43	76.81
2020-12-31 13:15:00	21.48	74.99
2020-12-31 13:30:00	21.43	68.91
2020-12-31 13:45:00	21.38	72.56
2020-12-31 14:00:00	21.48	75.6
2020-12-31 14:15:00	21.43	72.56
2020-12-31 14:30:00	21.48	68.91
2020-12-31 14:45:00	21.43	69.52
2020-12-31 15:00:00	21.48	74.99
2020-12-31 15:15:00	21.48	70.13
2020-12-31 15:30:00	21.59	67.69
2020-12-31 15:45:00	21.32	70.73
2020-12-31 16:00:00	21.95	75.6
2020-12-31 16:15:00	20.91	70.73
2020-12-31 16:30:00	21.64	68.91
2020-12-31 16:45:00	21.43	71.95
2020-12-31 17:00:00	21.85	75.6
2020-12-31 17:15:00	21.48	69.52
2020-12-31 17:30:00	21.48	66.48
2020-12-31 17:45:00	21.48	64.65
2020-12-31 18:00:00	21.48	68.3
2020-12-31 18:15:00	21.27	59.18
2020-12-31 18:30:00	21.22	54.92
2020-12-31 18:45:00	21.85	54.92
2020-12-31 19:00:00	21.48	54.32
2020-12-31 19:15:00	21.32	53.71
2020-12-31 19:30:00	21.17	53.1
2020-12-31 19:45:00	22	52.49
2020-12-31 20:00:00	21.38	50.67
2020-12-31 20:15:00	21.48	49.45
2020-12-31 20:30:00	21.48	48.24
2020-12-31 20:45:00	21.48	47.63
2020-12-31 21:00:00	21.48	47.02
2020-12-31 21:15:00	21.48	48.24
2020-12-31 21:30:00	21.48	53.71
2020-12-31 21:45:00	21.48	53.71
2020-12-31 22:00:00	21.48	57.36
2020-12-31 22:15:00	20.96	59.79
2020-12-31 22:30:00	20.02	60.4
2020-12-31 22:45:00	19.71	61
2020-12-31 23:00:00	19.24	61
2020-12-31 23:15:00	18.5	61.61
2020-12-31 23:30:00	18.24	67.09
2020-12-31 23:45:00	18.03	69.52
2021-01-01	17.72	69.52
2021-01-01 00:15:00	17.09	69.52
2021-01-01 00:30:00	18.35	68.3
2021-01-01 00:45:00	17.72	67.69
2021-01-01 01:00:00	17.25	67.69
2021-01-01 01:15:00	17.35	61.61
2021-01-01 01:30:00	18.14	59.18
2021-01-01 01:45:00	17.41	61
2021-01-01 02:00:00	17.3	62.83
2021-01-01 02:15:00	17.41	63.44
2021-01-01 02:30:00	18.03	63.44
2021-01-01 02:45:00	17.41	63.44
2021-01-01 03:00:00	17.3	62.83
2021-01-01 03:15:00	17.35	62.83
2021-01-01 03:30:00	18.09	64.04
2021-01-01 03:45:00	17.3	66.48
2021-01-01 04:00:00	17.62	66.48
2021-01-01 04:15:00	17.15	62.22
2021-01-01 04:30:00	18.14	63.44
2021-01-01 04:45:00	17.46	61.61
2021-01-01 05:00:00	17.25	63.44
2021-01-01 05:15:00	17.56	62.22
2021-01-01 05:30:00	18.61	63.44
2021-01-01 05:45:00	18.19	62.22
2021-01-01 06:00:00	19.34	63.44
2021-01-01 06:15:00	20.54	60.4
2021-01-01 06:30:00	21.43	61
2021-01-01 06:45:00	21.53	59.18
2021-01-01 07:00:00	21.48	61
2021-01-01 07:15:00	21.48	59.79
2021-01-01 07:30:00	21.48	61
2021-01-01 07:45:00	21.48	61
2021-01-01 08:00:00	21.48	62.83
2021-01-01 08:15:00	21.48	60.4
2021-01-01 08:30:00	21.43	62.22
2021-01-01 08:45:00	21.48	60.4
2021-01-01 09:00:00	21.48	62.22
2021-01-01 09:15:00	21.12	59.18
2021-01-01 09:30:00	20.8	56.14
2021-01-01 09:45:00	21.17	54.92
2021-01-01 10:00:00	20.96	54.32
2021-01-01 10:15:00	21.43	54.92
2021-01-01 10:30:00	21.27	60.4
2021-01-01 10:45:00	21.43	67.69
2021-01-01 11:00:00	21.43	74.38
2021-01-01 11:15:00	21.12	78.03
2021-01-01 11:30:00	21.43	77.42
2021-01-01 11:45:00	21.48	79.25
2021-01-01 12:00:00	21.53	81.68
2021-01-01 12:15:00	21.74	81.68
2021-01-01 12:30:00	21.69	74.38
2021-01-01 12:45:00	21.53	78.03
2021-01-01 13:00:00	21.64	83.5
2021-01-01 13:15:00	21.59	80.46
2021-01-01 13:30:00	21.69	73.77
2021-01-01 13:45:00	21.85	76.21
2021-01-01 14:00:00	21.74	81.68
2021-01-01 14:15:00	21.48	78.03
2021-01-01 14:30:00	21.38	74.99
2021-01-01 14:45:00	21.38	79.85
2021-01-01 15:00:00	21.43	83.5
2021-01-01 15:15:00	20.8	79.85
2021-01-01 15:30:00	21.59	74.99
2021-01-01 15:45:00	21.43	74.38
2021-01-01 16:00:00	21.64	80.46
2021-01-01 16:15:00	21.38	78.64
2021-01-01 16:30:00	21.01	72.56
2021-01-01 16:45:00	21.53	73.17
2021-01-01 17:00:00	21.12	79.25
2021-01-01 17:15:00	21.43	76.81
2021-01-01 17:30:00	21.06	71.34
2021-01-01 17:45:00	21.27	73.17
2021-01-01 18:00:00	21.32	71.95
2021-01-01 18:15:00	21.06	67.09
2021-01-01 18:30:00	21.43	61
2021-01-01 18:45:00	20.85	68.91
2021-01-01 19:00:00	21.69	62.83
2021-01-01 19:15:00	20.8	69.52
2021-01-01 19:30:00	21.27	65.26
2021-01-01 19:45:00	21.06	59.79
2021-01-01 20:00:00	21.43	56.75
2021-01-01 20:15:00	20.91	54.92
2021-01-01 20:30:00	21.43	61.61
2021-01-01 20:45:00	21.69	59.79
2021-01-01 21:00:00	21.43	62.22
2021-01-01 21:15:00	21.48	58.57
2021-01-01 21:30:00	21.43	60.4
2021-01-01 21:45:00	21.43	61.61
2021-01-01 22:00:00	21.38	61.61
2021-01-01 22:15:00	20.59	64.04
2021-01-01 22:30:00	19.6	66.48
2021-01-01 22:45:00	19.34	67.09
2021-01-01 23:00:00	19.55	65.26
2021-01-01 23:15:00	18.35	64.04
2021-01-01 23:30:00	17.98	64.04
2021-01-01 23:45:00	17.62	62.22
2021-01-02	17.41	62.22
2021-01-02 00:15:00	17.15	61.61
2021-01-02 00:30:00	18.14	63.44
2021-01-02 00:45:00	17.41	62.83
2021-01-02 01:00:00	17.35	63.44
2021-01-02 01:15:00	17.3	63.44
2021-01-02 01:30:00	18.03	63.44
2021-01-02 01:45:00	17.2	65.26
2021-01-02 02:00:00	17.77	65.26
2021-01-02 02:15:00	17.09	65.87
2021-01-02 02:30:00	18.03	65.87
2021-01-02 02:45:00	17.09	65.87
2021-01-02 03:00:00	17.88	65.26
2021-01-02 03:15:00	17.04	65.26
2021-01-02 03:30:00	18.09	65.26
2021-01-02 03:45:00	17.09	64.04
2021-01-02 04:00:00	17.93	62.83
2021-01-02 04:15:00	17.09	62.22
2021-01-02 04:30:00	18.03	62.83
2021-01-02 04:45:00	17.15	60.4
2021-01-02 05:00:00	17.77	59.79
2021-01-02 05:15:00	17.25	59.18
2021-01-02 05:30:00	18.56	59.18
2021-01-02 05:45:00	18.14	59.79
2021-01-02 06:00:00	19.24	56.75
2021-01-02 06:15:00	20.54	54.92
2021-01-02 06:30:00	21.32	56.75
2021-01-02 06:45:00	21.48	56.75
2021-01-02 07:00:00	21.43	57.96
2021-01-02 07:15:00	21.32	56.14
2021-01-02 07:30:00	21.53	57.36
2021-01-02 07:45:00	21.48	55.53
2021-01-02 08:00:00	21.53	53.71
2021-01-02 08:15:00	21.48	52.49
2021-01-02 08:30:00	21.48	52.49
2021-01-02 08:45:00	21.48	51.28
2021-01-02 09:00:00	21.48	51.28
2021-01-02 09:15:00	21.17	51.28
2021-01-02 09:30:00	20.85	50.67
2021-01-02 09:45:00	21.22	50.06
2021-01-02 10:00:00	20.75	49.45
2021-01-02 10:15:00	21.53	49.45
2021-01-02 10:30:00	20.96	54.32
2021-01-02 10:45:00	21.27	59.18
2021-01-02 11:00:00	21.17	63.44
2021-01-02 11:15:00	20.96	65.26
2021-01-02 11:30:00	21.01	65.26
2021-01-02 11:45:00	20.8	67.09
2021-01-02 12:00:00	21.43	68.3
2021-01-02 12:15:00	21.27	69.52
2021-01-02 12:30:00	21.8	64.04
2021-01-02 12:45:00	21.69	64.04
2021-01-02 13:00:00	21.53	67.69
2021-01-02 13:15:00	21.59	67.09
2021-01-02 13:30:00	21.48	65.26
2021-01-02 13:45:00	21.38	68.91
2021-01-02 14:00:00	20.91	67.09
2021-01-02 14:15:00	21.8	67.09
2021-01-02 14:30:00	21.38	63.44
2021-01-02 14:45:00	21.69	65.26
2021-01-02 15:00:00	21.43	68.91
2021-01-02 15:15:00	20.91	67.69
2021-01-02 15:30:00	21.53	62.83
2021-01-02 15:45:00	21.22	64.65
2021-01-02 16:00:00	21.8	68.3
2021-01-02 16:15:00	21.06	65.26
2021-01-02 16:30:00	21.59	63.44
2021-01-02 16:45:00	21.59	62.83
2021-01-02 17:00:00	21.53	67.09
2021-01-02 17:15:00	21.43	65.26
2021-01-02 17:30:00	21.48	63.44
2021-01-02 17:45:00	21.17	62.83
2021-01-02 18:00:00	21.69	64.65
2021-01-02 18:15:00	21.06	58.57
2021-01-02 18:30:00	21.64	53.71
2021-01-02 18:45:00	21.06	53.71
2021-01-02 19:00:00	21.69	54.32
2021-01-02 19:15:00	21.27	54.92
2021-01-02 19:30:00	21.17	53.71
2021-01-02 19:45:00	21.01	52.49
2021-01-02 20:00:00	21.48	53.1
2021-01-02 20:15:00	21.38	53.71
2021-01-02 20:30:00	21.43	56.14
2021-01-02 20:45:00	21.53	62.22
2021-01-02 21:00:00	21.48	64.04
2021-01-02 21:15:00	21.43	66.48
2021-01-02 21:30:00	21.48	70.13
2021-01-02 21:45:00	21.48	69.52
2021-01-02 22:00:00	21.43	72.56
2021-01-02 22:15:00	20.85	71.34
2021-01-02 22:30:00	19.6	69.52
2021-01-02 22:45:00	19.39	70.13
2021-01-02 23:00:00	19.55	70.73
2021-01-02 23:15:00	18.29	68.91
2021-01-02 23:30:00	17.88	69.52
2021-01-02 23:45:00	17.51	65.26
2021-01-03	17.3	63.44
2021-01-03 00:15:00	17.25	61
2021-01-03 00:30:00	18.03	58.57
2021-01-03 00:45:00	17.25	57.96
2021-01-03 01:00:00	17.67	59.79
2021-01-03 01:15:00	17.09	59.79
2021-01-03 01:30:00	18.09	59.79
2021-01-03 01:45:00	17.3	58.57
2021-01-03 02:00:00	17.56	59.18
2021-01-03 02:15:00	17.15	61
2021-01-03 02:30:00	18.09	58.57
2021-01-03 02:45:00	17.51	54.92
2021-01-03 03:00:00	17.2	52.49
2021-01-03 03:15:00	17.46	55.53
2021-01-03 03:30:00	17.98	55.53
2021-01-03 03:45:00	17.51	55.53
2021-01-03 04:00:00	17.3	54.32
2021-01-03 04:15:00	17.35	54.32
2021-01-03 04:30:00	17.93	53.71
2021-01-03 04:45:00	17.41	53.1
2021-01-03 05:00:00	17.35	51.88
2021-01-03 05:15:00	17.51	51.88
2021-01-03 05:30:00	18.56	52.49
2021-01-03 05:45:00	18.24	52.49
2021-01-03 06:00:00	18.87	53.71
2021-01-03 06:15:00	21.27	53.1
2021-01-03 06:30:00	21.38	53.71
2021-01-03 06:45:00	21.43	53.71
2021-01-03 07:00:00	21.53	54.32
2021-01-03 07:15:00	21.48	51.28
2021-01-03 07:30:00	21.48	51.28
2021-01-03 07:45:00	21.48	51.28
2021-01-03 08:00:00	21.48	51.88
2021-01-03 08:15:00	21.53	51.28
2021-01-03 08:30:00	21.43	52.49
2021-01-03 08:45:00	21.59	51.28
2021-01-03 09:00:00	21.64	48.84
2021-01-03 09:15:00	21.32	48.24
2021-01-03 09:30:00	21.01	50.67
2021-01-03 09:45:00	21.43	50.06
2021-01-03 10:00:00	21.27	49.45
2021-01-03 10:15:00	21.48	48.24
2021-01-03 10:30:00	21.43	53.1
2021-01-03 10:45:00	21.43	57.96
2021-01-03 11:00:00	21.53	57.96
2021-01-03 11:15:00	21.43	60.4
2021-01-03 11:30:00	21.43	61.61
2021-01-03 11:45:00	21.48	64.65
2021-01-03 12:00:00	21.53	66.48
2021-01-03 12:15:00	21.48	68.91
2021-01-03 12:30:00	21.53	63.44
2021-01-03 12:45:00	21.38	65.87
2021-01-03 13:00:00	21.53	69.52
2021-01-03 13:15:00	22.21	70.13
2021-01-03 13:30:00	21.12	63.44
2021-01-03 13:45:00	21.43	66.48
2021-01-03 14:00:00	21.17	70.13
2021-01-03 14:15:00	21.48	67.09
2021-01-03 14:30:00	21.74	62.22
2021-01-03 14:45:00	21.48	65.26
2021-01-03 15:00:00	21.43	68.3
2021-01-03 15:15:00	21.38	65.26
2021-01-03 15:30:00	21.22	62.83
2021-01-03 15:45:00	21.43	64.04
2021-01-03 16:00:00	21.85	67.69
2021-01-03 16:15:00	21.27	64.65
2021-01-03 16:30:00	21.06	61
2021-01-03 16:45:00	21.48	63.44
2021-01-03 17:00:00	21.38	65.26
2021-01-03 17:15:00	21.22	64.65
2021-01-03 17:30:00	21.64	59.79
2021-01-03 17:45:00	21.12	62.22
2021-01-03 18:00:00	21.69	59.18
2021-01-03 18:15:00	21.48	58.57
2021-01-03 18:30:00	21.17	52.49
2021-01-03 18:45:00	21.48	52.49
2021-01-03 19:00:00	21.38	51.88
2021-01-03 19:15:00	21.48	50.67
2021-01-03 19:30:00	21.22	50.06
2021-01-03 19:45:00	21.22	49.45
2021-01-03 20:00:00	21.38	48.84
2021-01-03 20:15:00	21.12	48.24
2021-01-03 20:30:00	21.48	50.06
2021-01-03 20:45:00	21.12	53.71
2021-01-03 21:00:00	21.43	50.67
2021-01-03 21:15:00	21.64	51.51
2021-01-03 21:30:00	21.59	50.09
2021-01-03 21:45:00	21.48	50.56
2021-01-03 22:00:00	21.48	51.04
2021-01-03 22:15:00	20.65	50.09
2021-01-03 22:30:00	19.76	49.62
2021-01-03 22:45:00	19.24	48.67
2021-01-03 23:00:00	18.82	48.2
2021-01-03 23:15:00	17.93	46.77
2021-01-03 23:30:00	17.72	47.25
2021-01-03 23:45:00	17.82	46.77
2021-01-04	17.67	45.83
2021-01-04 00:15:00	17.09	46.3
2021-01-04 00:30:00	18.24	42.98
2021-01-04 00:45:00	17.56	42.51
2021-01-04 01:00:00	17.15	43.46
2021-01-04 01:15:00	17.41	42.98
2021-01-04 01:30:00	18.19	42.51
2021-01-04 01:45:00	17.51	42.51
2021-01-04 02:00:00	17.2	42.03
2021-01-04 02:15:00	17.46	38.72
2021-01-04 02:30:00	17.93	42.51
2021-01-04 02:45:00	17.35	42.03
2021-01-04 03:00:00	17.25	41.56
2021-01-04 03:15:00	17.35	41.56
2021-01-04 03:30:00	18.19	45.83
2021-01-04 03:45:00	17.51	49.14
2021-01-04 04:00:00	17.15	49.14
2021-01-04 04:15:00	17.35	48.67
2021-01-04 04:30:00	18.35	51.51
2021-01-04 04:45:00	17.56	50.56
2021-01-04 05:00:00	17.15	52.93
2021-01-04 05:15:00	17.56	51.51
2021-01-04 05:30:00	18.71	48.67
2021-01-04 05:45:00	18.19	48.2
2021-01-04 06:00:00	19.39	46.77
2021-01-04 06:15:00	20.44	46.77
2021-01-04 06:30:00	21.12	45.83
2021-01-04 06:45:00	20.38	45.83
2021-01-04 07:00:00	21.59	45.83
2021-01-04 07:15:00	20.44	45.83
2021-01-04 07:30:00	21.85	49.14
2021-01-04 07:45:00	21.59	48.2
2021-01-04 08:00:00	21.43	50.56
2021-01-04 08:15:00	21.17	48.67
2021-01-04 08:30:00	20.91	47.72
2021-01-04 08:45:00	21.53	46.3
2021-01-04 09:00:00	21.48	45.83
2021-01-04 09:15:00	21.22	46.3
2021-01-04 09:30:00	21.48	45.83
2021-01-04 09:45:00	21.17	46.3
2021-01-04 10:00:00	21.43	45.83
2021-01-04 10:15:00	21.17	46.3
2021-01-04 10:30:00	21.48	52.46
2021-01-04 10:45:00	21.48	54.83
2021-01-04 11:00:00	21.48	54.36
2021-01-04 11:15:00	21.48	57.67
2021-01-04 11:30:00	21.53	60.04
2021-01-04 11:45:00	21.43	61.94
2021-01-04 12:00:00	21.53	64.31
2021-01-04 12:15:00	21.43	64.78
2021-01-04 12:30:00	21.48	61.94
2021-01-04 12:45:00	21.43	65.26
2021-01-04 13:00:00	21.48	66.21
2021-01-04 13:15:00	21.48	63.84
2021-01-04 13:30:00	21.38	60.99
2021-01-04 13:45:00	21.48	60.99
2021-01-04 14:00:00	21.43	64.78
2021-01-04 14:15:00	21.48	61.94
2021-01-04 14:30:00	21.43	58.15
2021-01-04 14:45:00	21.43	60.99
2021-01-04 15:00:00	21.43	62.89
2021-01-04 15:15:00	21.43	63.36
2021-01-04 15:30:00	21.53	59.1
2021-01-04 15:45:00	21.22	61.94
2021-01-04 16:00:00	21.64	63.36
2021-01-04 16:15:00	21.12	63.36
2021-01-04 16:30:00	21.69	59.57
2021-01-04 16:45:00	21.12	61.94
2021-01-04 17:00:00	21.64	63.84
2021-01-04 17:15:00	21.12	62.41
2021-01-04 17:30:00	21.43	59.1
2021-01-04 17:45:00	21.27	61.47
2021-01-04 18:00:00	21.8	60.04
2021-01-04 18:15:00	21.27	57.2
2021-01-04 18:30:00	21.12	51.99
2021-01-04 18:45:00	21.27	52.93
2021-01-04 19:00:00	21.59	51.99
2021-01-04 19:15:00	21.43	51.51
2021-01-04 19:30:00	21.17	50.56
2021-01-04 19:45:00	21.85	50.09
2021-01-04 20:00:00	21.48	50.09
2021-01-04 20:15:00	21.48	49.14
2021-01-04 20:30:00	21.48	48.67
2021-01-04 20:45:00	21.43	49.14
2021-01-04 21:00:00	21.38	56.25
2021-01-04 21:15:00	21.38	60.04
2021-01-04 21:30:00	21.32	60.52
2021-01-04 21:45:00	21.48	60.52
2021-01-04 22:00:00	21.43	60.52
2021-01-04 22:15:00	20.91	64.31
2021-01-04 22:30:00	19.81	61.94
2021-01-04 22:45:00	19.18	64.78
2021-01-04 23:00:00	18.82	66.21
2021-01-04 23:15:00	18.09	66.68
2021-01-04 23:30:00	17.93	65.73
2021-01-04 23:45:00	17.82	67.15
2021-01-05	17.72	64.78
2021-01-05 00:15:00	17.04	64.31
2021-01-05 00:30:00	18.29	63.84
2021-01-05 00:45:00	17.72	63.36
2021-01-05 01:00:00	17.15	63.84
2021-01-05 01:15:00	17.72	64.31
2021-01-05 01:30:00	17.82	64.78
2021-01-05 01:45:00	17.09	61.94
2021-01-05 02:00:00	17.93	58.15
2021-01-05 02:15:00	17.09	58.62
2021-01-05 02:30:00	18.09	59.57
2021-01-05 02:45:00	17.51	60.04
2021-01-05 03:00:00	17.15	60.99
2021-01-05 03:15:00	17.41	61.47
2021-01-05 03:30:00	18.24	60.99
2021-01-05 03:45:00	17.46	59.1
2021-01-05 04:00:00	17.15	60.04
2021-01-05 04:15:00	17.35	58.15
2021-01-05 04:30:00	18.03	58.62
2021-01-05 04:45:00	17.51	58.15
2021-01-05 05:00:00	17.2	57.2
2021-01-05 05:15:00	17.51	56.73
2021-01-05 05:30:00	18.61	56.25
2021-01-05 05:45:00	18.35	56.25
2021-01-05 06:00:00	18.87	54.83
2021-01-05 06:15:00	20.91	56.25
2021-01-05 06:30:00	21.38	54.83
2021-01-05 06:45:00	21.43	54.83
2021-01-05 07:00:00	21.48	53.88
2021-01-05 07:15:00	21.17	54.36
2021-01-05 07:30:00	21.53	53.41
2021-01-05 07:45:00	21.48	52.46
2021-01-05 08:00:00	21.48	51.51
2021-01-05 08:15:00	21.48	52.46
2021-01-05 08:30:00	21.43	52.46
2021-01-05 08:45:00	21.48	51.04
2021-01-05 09:00:00	21.53	48.67
2021-01-05 09:15:00	20.8	47.25
2021-01-05 09:30:00	21.32	46.77
2021-01-05 09:45:00	20.96	45.83
2021-01-05 10:00:00	21.22	45.35
2021-01-05 10:15:00	21.38	46.77
2021-01-05 10:30:00	21.43	49.62
2021-01-05 10:45:00	21.48	54.83
2021-01-05 11:00:00	21.43	57.67
2021-01-05 11:15:00	21.43	59.57
2021-01-05 11:30:00	21.53	60.52
2021-01-05 11:45:00	21.48	62.89
2021-01-05 12:00:00	21.43	65.26
2021-01-05 12:15:00	21.95	67.63
2021-01-05 12:30:00	21.38	61.47
2021-01-05 12:45:00	21.48	63.84
2021-01-05 13:00:00	21.53	67.15
2021-01-05 13:15:00	21.38	66.68
2021-01-05 13:30:00	21.22	64.78
2021-01-05 13:45:00	21.38	68.58
2021-01-05 14:00:00	21.53	68.1
2021-01-05 14:15:00	21.43	66.68
2021-01-05 14:30:00	21.48	63.84
2021-01-05 14:45:00	21.27	63.36
2021-01-05 15:00:00	21.12	67.15
2021-01-05 15:15:00	21.06	66.21
2021-01-05 15:30:00	21.59	60.52
2021-01-05 15:45:00	21.69	62.41
2021-01-05 16:00:00	21.59	65.26
2021-01-05 16:15:00	21.48	63.84
2021-01-05 16:30:00	21.43	59.57
2021-01-05 16:45:00	21.43	62.89
2021-01-05 17:00:00	21.53	61.94
2021-01-05 17:15:00	21.27	61.94
2021-01-05 17:30:00	20.96	57.67
2021-01-05 17:45:00	21.53	60.52
2021-01-05 18:00:00	21.38	57.2
2021-01-05 18:15:00	21.22	55.78
2021-01-05 18:30:00	21.53	51.99
2021-01-05 18:45:00	21.12	52.93
2021-01-05 19:00:00	21.9	52.93
2021-01-05 19:15:00	21.38	52.93
2021-01-05 19:30:00	21.01	50.56
2021-01-05 19:45:00	21.64	50.56
2021-01-05 20:00:00	21.22	50.56
2021-01-05 20:15:00	21.27	49.62
2021-01-05 20:30:00	21.32	49.62
2021-01-05 20:45:00	21.74	47.72
2021-01-05 21:00:00	21.48	41.56
2021-01-05 21:15:00	21.12	41.09
2021-01-05 21:30:00	20.8	36.82
2021-01-05 21:45:00	21.64	36.82
2021-01-05 22:00:00	21.38	40.14
2021-01-05 22:15:00	20.8	40.61
2021-01-05 22:30:00	19.71	40.14
2021-01-05 22:45:00	19.08	39.66
2021-01-05 23:00:00	19.65	39.19
2021-01-05 23:15:00	18.4	42.03
2021-01-05 23:30:00	18.03	46.77
2021-01-05 23:45:00	17.77	50.09
2021-01-06	17.56	51.04
2021-01-06 00:15:00	17.09	53.41
2021-01-06 00:30:00	18.24	52.46
2021-01-06 00:45:00	17.67	51.51
2021-01-06 01:00:00	17.2	49.62
2021-01-06 01:15:00	17.62	46.3
2021-01-06 01:30:00	18.09	44.4
2021-01-06 01:45:00	17.41	42.51
2021-01-06 02:00:00	17.2	41.56
2021-01-06 02:15:00	17.41	40.61
2021-01-06 02:30:00	18.14	40.14
2021-01-06 02:45:00	17.41	41.56
2021-01-06 03:00:00	17.41	42.03
2021-01-06 03:15:00	17.3	42.98
2021-01-06 03:30:00	17.93	46.3
2021-01-06 03:45:00	17.46	47.72
2021-01-06 04:00:00	17.25	49.14
2021-01-06 04:15:00	17.35	48.67
2021-01-06 04:30:00	18.09	51.51
2021-01-06 04:45:00	17.25	49.62
2021-01-06 05:00:00	17.62	52.93
2021-01-06 05:15:00	17.3	51.04
2021-01-06 05:30:00	18.61	50.09
2021-01-06 05:45:00	18.14	47.25
2021-01-06 06:00:00	19.34	46.77
2021-01-06 06:15:00	20.54	47.25
2021-01-06 06:30:00	21.38	46.77
2021-01-06 06:45:00	21.53	46.3
2021-01-06 07:00:00	21.48	46.3
2021-01-06 07:15:00	21.48	46.3
2021-01-06 07:30:00	21.53	47.25
2021-01-06 07:45:00	21.48	46.77
2021-01-06 08:00:00	21.48	46.77
2021-01-06 08:15:00	21.48	48.2
2021-01-06 08:30:00	21.43	45.83
2021-01-06 08:45:00	21.43	46.3
2021-01-06 09:00:00	21.27	46.3
2021-01-06 09:15:00	20.01	46.77
2021-01-06 09:30:00	20.74	47.25
2021-01-06 09:45:00	20.48	47.72
2021-01-06 10:00:00	20.53	47.25
2021-01-06 10:15:00	20.48	48.67
2021-01-06 10:30:00	20.48	48.67
2021-01-06 10:45:00	20.43	47.72
2021-01-06 11:00:00	20.48	51.99
2021-01-06 11:15:00	20.58	49.14
2021-01-06 11:30:00	20.43	51.04
2021-01-06 11:45:00	20.43	52.93
2021-01-06 12:00:00	20.74	51.04
2021-01-06 12:15:00	20.53	53.41
2021-01-06 12:30:00	21.27	51.04
2021-01-06 12:45:00	21.53	51.99
2021-01-06 13:00:00	21.53	52.93
2021-01-06 13:15:00	22	49.62
2021-01-06 13:30:00	21.58	51.51
2021-01-06 13:45:00	21.48	49.62
2021-01-06 14:00:00	21.42	51.04
2021-01-06 14:15:00	21.37	49.14
2021-01-06 14:30:00	21.53	49.62
2021-01-06 14:45:00	21.42	49.62
2021-01-06 15:00:00	21.48	49.14
2021-01-06 15:15:00	21.21	50.09
2021-01-06 15:30:00	21	49.14
2021-01-06 15:45:00	21.48	49.62
2021-01-06 16:00:00	21.42	48.67
2021-01-06 16:15:00	21.06	49.14
2021-01-06 16:30:00	20.79	48.67
2021-01-06 16:45:00	21	49.14
2021-01-06 17:00:00	20.79	48.2
2021-01-06 17:15:00	21.48	48.2
2021-01-06 17:30:00	21.48	46.77
2021-01-06 17:45:00	21.48	45.83
2021-01-06 18:00:00	21.48	45.83
2021-01-06 18:15:00	21.48	43.93
2021-01-06 18:30:00	21.48	43.46
2021-01-06 18:45:00	21.48	43.46
2021-01-06 19:00:00	21.48	45.35
2021-01-06 19:15:00	21	43.46
2021-01-06 19:30:00	20.48	44.4
2021-01-06 19:45:00	21	44.88
2021-01-06 20:00:00	20.9	45.35
2021-01-06 20:15:00	21.48	46.3
2021-01-06 20:30:00	21.42	43.93
2021-01-06 20:45:00	21.48	43.46
2021-01-06 21:00:00	21.48	43.46
2021-01-06 21:15:00	21.48	44.88
2021-01-06 21:30:00	21.48	46.3
2021-01-06 21:45:00	21.48	50.09
2021-01-06 22:00:00	21.48	51.51
2021-01-06 22:15:00	20.9	51.04
2021-01-06 22:30:00	19.48	49.62
2021-01-06 22:45:00	19.64	51.04
2021-01-06 23:00:00	19.32	51.99
2021-01-06 23:15:00	18.27	51.04
2021-01-06 23:30:00	17.85	51.51
2021-01-06 23:45:00	17.59	51.99
2021-01-07	17.33	50.56
2021-01-07 00:15:00	17.33	51.51
2021-01-07 00:30:00	18.06	50.56
2021-01-07 00:45:00	17.33	49.14
2021-01-07 01:00:00	17.59	50.09
2021-01-07 01:15:00	17.22	49.14
2021-01-07 01:30:00	18.01	49.62
2021-01-07 01:45:00	17.54	51.51
2021-01-07 02:00:00	17.17	49.62
2021-01-07 02:15:00	17.38	49.14
2021-01-07 02:30:00	18.06	47.72
2021-01-07 02:45:00	17.27	45.83
2021-01-07 03:00:00	17.54	48.2
2021-01-07 03:15:00	17.17	49.14
2021-01-07 03:30:00	18.12	50.09
2021-01-07 03:45:00	17.27	50.56
2021-01-07 04:00:00	17.64	49.14
2021-01-07 04:15:00	17.12	46.77
2021-01-07 04:30:00	18.06	48.67
2021-01-07 04:45:00	17.27	47.25
2021-01-07 05:00:00	17.64	46.3
2021-01-07 05:15:00	17.38	45.83
2021-01-07 05:30:00	18.64	46.3
2021-01-07 05:45:00	18.17	45.83
2021-01-07 06:00:00	19.38	45.83
2021-01-07 06:15:00	20.48	46.3
2021-01-07 06:30:00	21.37	49.14
2021-01-07 06:45:00	21.53	48.67
2021-01-07 07:00:00	21.42	49.14
2021-01-07 07:15:00	21.53	47.25
2021-01-07 07:30:00	21.42	48.67
2021-01-07 07:45:00	21.48	48.2
2021-01-07 08:00:00	21.53	47.25
2021-01-07 08:15:00	21.53	47.25
2021-01-07 08:30:00	21.42	47.25
2021-01-07 08:45:00	21.42	47.25
2021-01-07 09:00:00	21.42	47.25
2021-01-07 09:15:00	21.48	46.77
2021-01-07 09:30:00	21.48	47.72
2021-01-07 09:45:00	21.48	46.77
2021-01-07 10:00:00	21.21	47.25
2021-01-07 10:15:00	20.01	46.3
2021-01-07 10:30:00	21.42	50.09
2021-01-07 10:45:00	21.42	53.88
2021-01-07 11:00:00	21.37	56.73
2021-01-07 11:15:00	20.9	58.15
2021-01-07 11:30:00	21.27	59.57
2021-01-07 11:45:00	21.53	60.99
2021-01-07 12:00:00	21.48	61.94
2021-01-07 12:15:00	21.48	63.36
2021-01-07 12:30:00	21.48	58.15
2021-01-07 12:45:00	21.48	58.62
2021-01-07 13:00:00	21.48	60.99
2021-01-07 13:15:00	21.48	62.41
2021-01-07 13:30:00	21.48	58.15
2021-01-07 13:45:00	21.42	59.1
2021-01-07 14:00:00	21.42	61.94
2021-01-07 14:15:00	21.48	63.36
2021-01-07 14:30:00	21.48	58.62
2021-01-07 14:45:00	21.48	60.52
2021-01-07 15:00:00	21.48	63.36
2021-01-07 15:15:00	21	64.31
2021-01-07 15:30:00	21.32	59.57
2021-01-07 15:45:00	21.21	62.41
2021-01-07 16:00:00	21.53	64.78
2021-01-07 16:15:00	20.9	62.41
2021-01-07 16:30:00	21.85	60.99
2021-01-07 16:45:00	20.9	63.84
2021-01-07 17:00:00	21.85	65.73
2021-01-07 17:15:00	20.85	62.41
2021-01-07 17:30:00	21.79	61.47
2021-01-07 17:45:00	20.95	59.57
2021-01-07 18:00:00	21.74	61.47
2021-01-07 18:15:00	20.64	55.3
2021-01-07 18:30:00	21.74	50.56
2021-01-07 18:45:00	20.9	51.04
2021-01-07 19:00:00	21.79	51.51
2021-01-07 19:15:00	20.9	51.51
2021-01-07 19:30:00	21.9	51.51
2021-01-07 19:45:00	20.79	51.04
2021-01-07 20:00:00	21.85	49.62
2021-01-07 20:15:00	20.79	49.14
2021-01-07 20:30:00	21.79	49.62
2021-01-07 20:45:00	21.64	49.62
2021-01-07 21:00:00	21.48	48.2
2021-01-07 21:15:00	21.48	48.67
2021-01-07 21:30:00	21.48	49.62
2021-01-07 21:45:00	21.53	51.99
2021-01-07 22:00:00	21.48	57.67
2021-01-07 22:15:00	20.69	65.26
2021-01-07 22:30:00	19.8	66.68
2021-01-07 22:45:00	19.11	68.1
2021-01-07 23:00:00	19.11	67.15
2021-01-07 23:15:00	18.43	65.73
2021-01-07 23:30:00	18.22	66.21
2021-01-07 23:45:00	18.06	63.84
2021-01-08	17.8	62.89
2021-01-08 00:15:00	17.06	62.41
2021-01-08 00:30:00	18.38	61.47
2021-01-08 00:45:00	17.64	60.04
2021-01-08 01:00:00	17.22	60.04
2021-01-08 01:15:00	17.69	56.73
2021-01-08 01:30:00	17.96	54.36
2021-01-08 01:45:00	17.22	52.93
2021-01-08 02:00:00	17.69	51.99
2021-01-08 02:15:00	17.17	52.93
2021-01-08 02:30:00	18.06	54.36
2021-01-08 02:45:00	17.54	56.25
2021-01-08 03:00:00	17.12	56.25
2021-01-08 03:15:00	17.38	56.25
2021-01-08 03:30:00	18.27	58.15
2021-01-08 03:45:00	17.38	58.15
2021-01-08 04:00:00	17.43	57.67
2021-01-08 04:15:00	17.22	54.83
2021-01-08 04:30:00	18.06	53.88
2021-01-08 04:45:00	17.12	54.83
2021-01-08 05:00:00	17.91	53.88
2021-01-08 05:15:00	17.22	53.41
2021-01-08 05:30:00	18.59	54.36
2021-01-08 05:45:00	18.17	53.88
2021-01-08 06:00:00	19.17	55.3
2021-01-08 06:15:00	20.53	51.99
2021-01-08 06:30:00	21.27	53.41
2021-01-08 06:45:00	21.42	52.93
2021-01-08 07:00:00	21.42	52.46
2021-01-08 07:15:00	20.9	50.56
2021-01-08 07:30:00	21.42	52.46
2021-01-08 07:45:00	21.48	51.04
2021-01-08 08:00:00	21.48	52.46
2021-01-08 08:15:00	21.48	50.09
2021-01-08 08:30:00	21.42	51.51
2021-01-08 08:45:00	21.32	51.04
2021-01-08 09:00:00	20.79	49.62
2021-01-08 09:15:00	20.01	50.09
2021-01-08 09:30:00	21.16	49.62
2021-01-08 09:45:00	19.95	49.14
2021-01-08 10:00:00	20.37	49.62
2021-01-08 10:15:00	20.58	48.2
2021-01-08 10:30:00	20.53	51.99
2021-01-08 10:45:00	20.48	55.78
2021-01-08 11:00:00	20.48	59.57
2021-01-08 11:15:00	20.37	61.94
2021-01-08 11:30:00	20.58	60.99
2021-01-08 11:45:00	20.79	62.89
2021-01-08 12:00:00	21	64.78
2021-01-08 12:15:00	20.64	66.21
2021-01-08 12:30:00	21.42	60.99
2021-01-08 12:45:00	21.64	59.57
2021-01-08 13:00:00	21.85	61.94
2021-01-08 13:15:00	21.48	62.41
2021-01-08 13:30:00	21.58	59.1
2021-01-08 13:45:00	21.48	59.57
2021-01-08 14:00:00	21.42	61.94
2021-01-08 14:15:00	21.48	62.89
2021-01-08 14:30:00	21.32	59.57
2021-01-08 14:45:00	21.53	59.57
2021-01-08 15:00:00	21.37	62.41
2021-01-08 15:15:00	21.16	63.84
2021-01-08 15:30:00	20.85	60.04
2021-01-08 15:45:00	21.32	60.04
2021-01-08 16:00:00	20.74	62.89
2021-01-08 16:15:00	21	63.84
2021-01-08 16:30:00	20.53	59.57
2021-01-08 16:45:00	21.06	60.52
2021-01-08 17:00:00	20.58	62.41
2021-01-08 17:15:00	20.48	63.36
2021-01-08 17:30:00	20.9	58.62
2021-01-08 17:45:00	21.37	59.1
2021-01-08 18:00:00	21.48	60.52
2021-01-08 18:15:00	21.42	53.88
2021-01-08 18:30:00	21.48	50.09
2021-01-08 18:45:00	21.48	51.04
2021-01-08 19:00:00	21.42	51.04
2021-01-08 19:15:00	21.48	51.04
2021-01-08 19:30:00	21.42	51.51
2021-01-08 19:45:00	21.48	55.78
2021-01-08 20:00:00	21.42	64.31
2021-01-08 20:15:00	20.74	63.84
2021-01-08 20:30:00	21.27	63.36
2021-01-08 20:45:00	21.42	62.41
2021-01-08 21:00:00	21.42	61.47
2021-01-08 21:15:00	21.32	61.94
2021-01-08 21:30:00	21.42	61.47
2021-01-08 21:45:00	21.42	60.04
2021-01-08 22:00:00	21.37	60.04
2021-01-08 22:15:00	19.9	62.89
2021-01-08 22:30:00	19.95	63.36
2021-01-08 22:45:00	19.69	63.84
2021-01-08 23:00:00	18.48	62.89
2021-01-08 23:15:00	18.22	64.31
2021-01-08 23:30:00	17.17	64.31
2021-01-08 23:45:00	17.48	65.26
2021-01-09	17.64	62.41
2021-01-09 00:15:00	17.01	65.26
2021-01-09 00:30:00	18.06	63.84
2021-01-09 00:45:00	17.06	62.89
2021-01-09 01:00:00	17.38	62.89
2021-01-09 01:15:00	17.69	62.41
2021-01-09 01:30:00	17.22	63.84
2021-01-09 01:45:00	17.59	62.89
2021-01-09 02:00:00	17.33	60.52
2021-01-09 02:15:00	17.48	59.57
2021-01-09 02:30:00	17.59	62.41
2021-01-09 02:45:00	17.38	60.52
2021-01-09 03:00:00	17.59	57.67
2021-01-09 03:15:00	17.33	57.67
2021-01-09 03:30:00	17.54	55.78
2021-01-09 03:45:00	17.43	52.46
2021-01-09 04:00:00	17.43	54.83
2021-01-09 04:15:00	17.43	54.36
2021-01-09 04:30:00	17.54	50.56
2021-01-09 04:45:00	17.43	52.93
2021-01-09 05:00:00	17.43	51.51
2021-01-09 05:15:00	17.64	52.93
2021-01-09 05:30:00	18.12	53.88
2021-01-09 05:45:00	18.59	50.56
2021-01-09 06:00:00	18.85	53.88
2021-01-09 06:15:00	20.16	53.88
2021-01-09 06:30:00	20.64	54.83
2021-01-09 06:45:00	20.69	54.83
2021-01-09 07:00:00	20.22	54.83
2021-01-09 07:15:00	21.06	53.88
2021-01-09 07:30:00	20.85	54.83
2021-01-09 07:45:00	20.58	55.78
2021-01-09 08:00:00	20.53	56.25
2021-01-09 08:15:00	20.01	54.83
2021-01-09 08:30:00	21.21	55.3
2021-01-09 08:45:00	21.16	54.83
2021-01-09 09:00:00	21.16	52.46
2021-01-09 09:15:00	19.9	52.93
2021-01-09 09:30:00	20.74	51.51
2021-01-09 09:45:00	20.53	50.56
2021-01-09 10:00:00	20.58	50.56
2021-01-09 10:15:00	20.27	50.09
2021-01-09 10:30:00	21.21	54.36
2021-01-09 10:45:00	21.27	59.1
2021-01-09 11:00:00	21.37	62.41
2021-01-09 11:15:00	20.53	64.78
2021-01-09 11:30:00	20.9	64.78
2021-01-09 11:45:00	21.48	65.73
2021-01-09 12:00:00	21.48	66.21
2021-01-09 12:15:00	21.53	68.1
2021-01-09 12:30:00	21.42	62.41
2021-01-09 12:45:00	21.42	63.36
2021-01-09 13:00:00	21.42	65.26
2021-01-09 13:15:00	20.9	61.47
2021-01-09 13:30:00	21.37	59.1
2021-01-09 13:45:00	21.53	61.94
2021-01-09 14:00:00	21.42	63.84
2021-01-09 14:15:00	21.53	59.1
2021-01-09 14:30:00	21.58	59.57
2021-01-09 14:45:00	21.27	57.67
2021-01-09 15:00:00	21.42	61.47
2021-01-09 15:15:00	21.27	59.57
2021-01-09 15:30:00	21.37	60.52
2021-01-09 15:45:00	21.37	62.89
2021-01-09 16:00:00	21.48	58.62
2021-01-09 16:15:00	21.27	61.47
2021-01-09 16:30:00	21	57.2
2021-01-09 16:45:00	21.48	59.1
2021-01-09 17:00:00	21.48	60.52
2021-01-09 17:15:00	21.48	56.25
2021-01-09 17:30:00	21.48	56.73
2021-01-09 17:45:00	21.48	54.36
2021-01-09 18:00:00	21.48	56.73
2021-01-09 18:15:00	21.16	51.99
2021-01-09 18:30:00	21.06	49.14
2021-01-09 18:45:00	21.48	50.09
2021-01-09 19:00:00	21.42	50.56
2021-01-09 19:15:00	21.16	53.41
2021-01-09 19:30:00	21.06	49.62
2021-01-09 19:45:00	21.48	51.51
2021-01-09 20:00:00	21.48	54.83
2021-01-09 20:15:00	21.48	56.73
2021-01-09 20:30:00	21.48	57.67
2021-01-09 20:45:00	21.48	56.73
2021-01-09 21:00:00	21.48	56.73
2021-01-09 21:15:00	21.48	56.25
2021-01-09 21:30:00	21.48	56.25
2021-01-09 21:45:00	21.48	55.78
2021-01-09 22:00:00	21.48	55.78
2021-01-09 22:15:00	21	56.73
2021-01-09 22:30:00	19.9	64.31
2021-01-09 22:45:00	19.17	68.1
2021-01-09 23:00:00	18.8	67.63
2021-01-09 23:15:00	18.33	66.21
2021-01-09 23:30:00	18.17	67.63
2021-01-09 23:45:00	18.01	70.47
2021-01-10	17.8	71.42
2021-01-10 00:15:00	17.06	68.1
2021-01-10 00:30:00	18.38	67.73
2021-01-10 00:45:00	17.85	64.3
2021-01-10 01:00:00	17.48	60.37
2021-01-10 01:15:00	17.06	58.41
2021-01-10 01:30:00	18.22	53.01
2021-01-10 01:45:00	17.69	49.09
2021-01-10 02:00:00	17.38	49.58
2021-01-10 02:15:00	17.17	47.61
2021-01-10 02:30:00	18.22	46.14
2021-01-10 02:45:00	17.59	50.56
2021-01-10 03:00:00	17.17	58.41
2021-01-10 03:15:00	17.54	61.84
2021-01-10 03:30:00	18.17	65.77
2021-01-10 03:45:00	17.43	64.3
2021-01-10 04:00:00	17.17	65.28
2021-01-10 04:15:00	17.48	61.35
2021-01-10 04:30:00	17.85	60.86
2021-01-10 04:45:00	17.27	59.39
2021-01-10 05:00:00	17.43	57.92
2021-01-10 05:15:00	17.54	57.92
2021-01-10 05:30:00	18.38	57.43
2021-01-10 05:45:00	18.64	61.84
2021-01-10 06:00:00	18.75	61.35
2021-01-10 06:15:00	20.95	63.81
2021-01-10 06:30:00	21.37	62.33
2021-01-10 06:45:00	21.42	64.3
2021-01-10 07:00:00	21.53	62.33
2021-01-10 07:15:00	21.53	63.81
2021-01-10 07:30:00	21.48	62.33
2021-01-10 07:45:00	21.53	62.83
2021-01-10 08:00:00	21.42	61.35
2021-01-10 08:15:00	21.48	61.84
2021-01-10 08:30:00	21.42	61.35
2021-01-10 08:45:00	21.53	60.86
2021-01-10 09:00:00	21.53	61.35
2021-01-10 09:15:00	21.69	61.84
2021-01-10 09:30:00	21.06	56.94
2021-01-10 09:45:00	21.42	55.96
2021-01-10 10:00:00	21.42	54.97
2021-01-10 10:15:00	21.48	53.99
2021-01-10 10:30:00	21.48	53.01
2021-01-10 10:45:00	21.48	59.39
2021-01-10 11:00:00	21.53	66.26
2021-01-10 11:15:00	21.64	67.24
2021-01-10 11:30:00	21.42	66.75
2021-01-10 11:45:00	21.64	68.22
2021-01-10 12:00:00	21.53	71.17
2021-01-10 12:15:00	21.42	73.62
2021-01-10 12:30:00	21.16	74.11
2021-01-10 12:45:00	21.48	67.73
2021-01-10 13:00:00	21.69	69.2
2021-01-10 13:15:00	21.79	73.62
2021-01-10 13:30:00	21.37	72.64
2021-01-10 13:45:00	22	65.28
2021-01-10 14:00:00	21.64	67.24
2021-01-10 14:15:00	21.16	71.17
2021-01-10 14:30:00	21	67.24
2021-01-10 14:45:00	21.42	65.28
2021-01-10 15:00:00	21.48	63.81
2021-01-10 15:15:00	21.53	69.2
2021-01-10 15:30:00	21.48	67.24
2021-01-10 15:45:00	21.42	63.32
2021-01-10 16:00:00	21.74	62.83
2021-01-10 16:15:00	21.74	68.22
2021-01-10 16:30:00	21.37	66.26
2021-01-10 16:45:00	21.53	62.33
2021-01-10 17:00:00	21.48	64.3
2021-01-10 17:15:00	21.11	68.71
2021-01-10 17:30:00	21.21	63.81
2021-01-10 17:45:00	21.79	63.32
2021-01-10 18:00:00	21.53	60.86
2021-01-10 18:15:00	21	63.81
2021-01-10 18:30:00	21.21	56.94
2021-01-10 18:45:00	21.74	55.47
2021-01-10 19:00:00	21.53	55.47
2021-01-10 19:15:00	21	56.45
2021-01-10 19:30:00	21.21	55.96
2021-01-10 19:45:00	21.27	55.47
2021-01-10 20:00:00	21.48	57.43
2021-01-10 20:15:00	21.79	60.86
2021-01-10 20:30:00	21.32	60.86
2021-01-10 20:45:00	21.21	62.33
2021-01-10 21:00:00	21.48	67.73
2021-01-10 21:15:00	21.42	71.17
2021-01-10 21:30:00	21.48	74.11
2021-01-10 21:45:00	21.48	72.64
2021-01-10 22:00:00	21.48	70.19
2021-01-10 22:15:00	20.95	76.07
2021-01-10 22:30:00	20.22	78.04
2021-01-10 22:45:00	19.74	78.04
2021-01-10 23:00:00	19.38	73.13
2021-01-10 23:15:00	18.54	76.07
2021-01-10 23:30:00	18.33	76.07
2021-01-10 23:45:00	18.43	77.05
2021-01-11	18.38	76.56
2021-01-11 00:15:00	17.12	77.05
2021-01-11 00:30:00	18.22	75.58
2021-01-11 00:45:00	17.96	74.11
2021-01-11 01:00:00	17.8	72.64
2021-01-11 01:15:00	17.06	72.64
2021-01-11 01:30:00	18.12	71.66
2021-01-11 01:45:00	17.91	71.66
2021-01-11 02:00:00	17.64	71.17
2021-01-11 02:15:00	17.01	71.66
2021-01-11 02:30:00	18.17	72.15
2021-01-11 02:45:00	17.91	69.2
2021-01-11 03:00:00	17.64	69.2
2021-01-11 03:15:00	17.01	69.69
2021-01-11 03:30:00	18.17	69.2
2021-01-11 03:45:00	17.8	69.69
2021-01-11 04:00:00	17.54	71.17
2021-01-11 04:15:00	17.01	70.19
2021-01-11 04:30:00	18.22	64.3
2021-01-11 04:45:00	17.8	61.84
2021-01-11 05:00:00	17.59	59.88
2021-01-11 05:15:00	17.17	59.88
2021-01-11 05:30:00	18.75	59.39
2021-01-11 05:45:00	18.43	62.83
2021-01-11 06:00:00	18.75	63.81
2021-01-11 06:15:00	21.06	65.77
2021-01-11 06:30:00	21.42	64.3
2021-01-11 06:45:00	21.48	66.26
2021-01-11 07:00:00	21.48	65.28
2021-01-11 07:15:00	21.53	66.75
2021-01-11 07:30:00	21.48	66.26
2021-01-11 07:45:00	21.48	65.77
2021-01-11 08:00:00	21.42	66.26
2021-01-11 08:15:00	21.53	65.28
2021-01-11 08:30:00	21.48	66.26
2021-01-11 08:45:00	21.48	64.79
2021-01-11 09:00:00	21.48	62.33
2021-01-11 09:15:00	21.48	64.3
2021-01-11 09:30:00	21.42	60.86
2021-01-11 09:45:00	21.53	57.43
2021-01-11 10:00:00	21.32	56.94
2021-01-11 10:15:00	20.85	55.47
2021-01-11 10:30:00	21.37	57.43
2021-01-11 10:45:00	21.58	62.83
2021-01-11 11:00:00	21.42	70.19
2021-01-11 11:15:00	21.48	71.17
2021-01-11 11:30:00	21.48	73.62
2021-01-11 11:45:00	21.42	75.58
2021-01-11 12:00:00	21.69	79.02
2021-01-11 12:15:00	21.64	81.47
2021-01-11 12:30:00	21.27	81.47
2021-01-11 12:45:00	21.42	74.11
2021-01-11 13:00:00	21.53	76.07
2021-01-11 13:15:00	21.64	80.98
2021-01-11 13:30:00	21.58	83.43
2021-01-11 13:45:00	21.32	74.6
2021-01-11 14:00:00	21.48	78.53
2021-01-11 14:15:00	21.64	82.45
2021-01-11 14:30:00	21.53	78.53
2021-01-11 14:45:00	21.37	75.58
2021-01-11 15:00:00	21.42	75.58
2021-01-11 15:15:00	21.42	81.47
2021-01-11 15:30:00	21.48	76.56
2021-01-11 15:45:00	21.69	75.58
2021-01-11 16:00:00	20.9	77.55
2021-01-11 16:15:00	22.06	81.96
2021-01-11 16:30:00	21.48	75.09
2021-01-11 16:45:00	21.42	77.05
2021-01-11 17:00:00	21.42	76.56
2021-01-11 17:15:00	21.21	80.98
2021-01-11 17:30:00	21.37	77.55
2021-01-11 17:45:00	22	71.17
[truncated: 4,210 more rows]
